# Supplementary material for: In Vitro α-Glycosidase Inhibition and In Silico Studies of Flavonoids Isolated from Pistacia integerrima Stew ex Brandis
Source: Biomed Res Int. 2022 Sep 9;2022:9636436. doi: 10.1155/2022/9636436 (PMC9481312; doi:10.1155/2022/9636436)
Supplement: Supplementary Materials — The supporting information related to this manuscript is available online free of charge (See supplementary file). Scheme 1 and 2 for isolation of flavonoids isolated from Pistacia integerrima. (PDF). [file 9636436.f1.docx]

**In vitro α-glycosidase inhibition and in silico studies of Flavonoids isolated from *Pistacia integerrima* Stew ex Brandis**

Hassan A. Hemeg1, Abdur Rauf2*, Umer Rashid3, Naveed Muhammad4, Yahya S. Al-Awthan5, Omar Bahattab5, Mohammed A. Al-Duais6,7, Syed Uzair Ali Shah8

1Department of Medical Laboratory Technology, College of Applied Medical Sciences, Taibah University, P.O. Box 344, Al-Madinah Al-Monawra 41411, Saudi Arabia.

2Department of Chemistry, University of Swabi, Swabi, Anbar, 23430, Khyber Pakhtunkhwa (KP), Pakistan.

3Department of Chemistry, COMSATS University Islamabad, Abbottabad Campus, 22060 Abbottabad, Pakistan

4Department of Pharmacy, Abdul Wali Khan University, Mardan, Khyber Pakhtunkhwa (KP), Pakistan.

5Department of Biology, Faculty of Science, University of Tabuk, Tabuk, Saudi Arabia.

6Department of Biochemistry, Faculty of Science, University of Tabuk, Tabuk, Saudi Arabia.

7Biochemistry Unit, Chemistry Department, Faculty of Science, Ibb University, Ibb, Yemen

8Department of Pharmacy, University of Swabi, Swabi, Anbar, 23430, Khyber Pakhtunkhwa (KP), Pakistan

**Corresponding author**

**Abdur Rauf**- Department of Chemistry, University of Swabi, Swabi, Anbar, 23430, Khyber Pakhtunkhwa (KP), Pakistan; [abdurrauf@uoswabi.edu.pk](mailto:abdurrauf@uoswabi.edu.pk)

**Scheme S1:** The extraction and fractionation of *Pistacia integerrima.*

Scheme S2: The isolation of flavonoids from ethyl acetate fraction of *Pistacia integerrima.*
